# Supplementary material
Source: PubMed Central journal article supplement (PMC3124619)

Fig.2

A

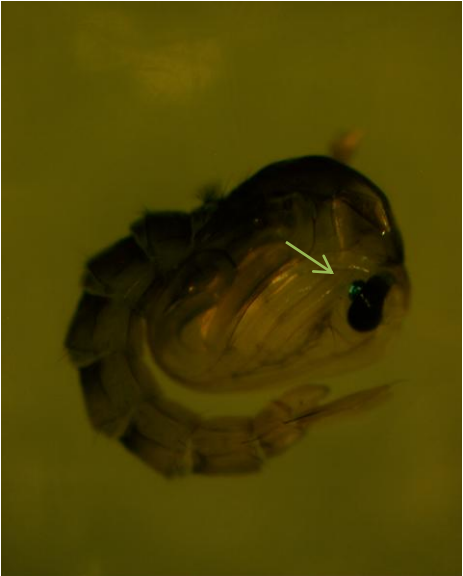

B

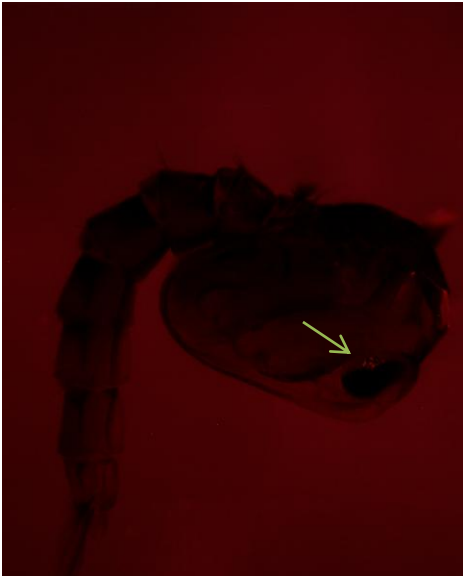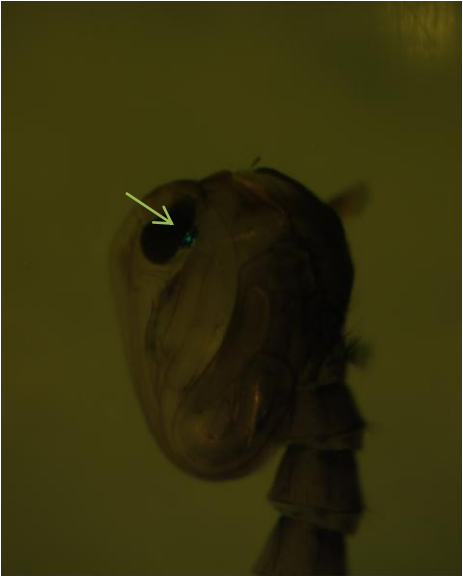

C

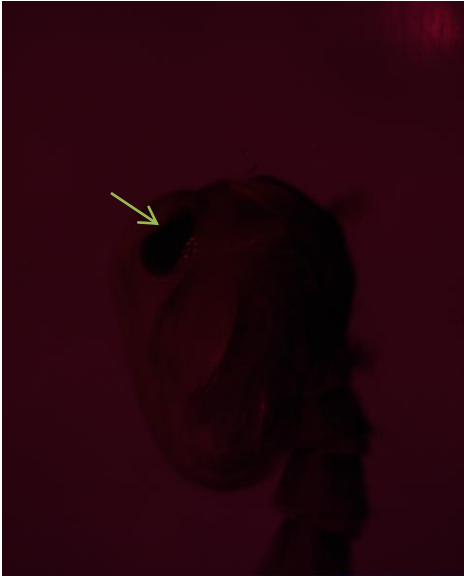

D

Supplement: NIHMS292329-supplement-04.pdf [file NIHMS292329-supplement-04.pdf]
